# Supplementary material for: Comparison of serum and saliva miRNAs for identification and characterization of mTBI in adult mixed martial arts fighters
Source: PubMed Central journal article supplement (PMC6314626; doi:10.1371/journal.pone.0207785), 2019-01-02
Supplement: pone.0207785.s002.pdf [file pone.0207785.s002.pdf]

# UBIQUITIN MEDIATED PROTEOLYSIS

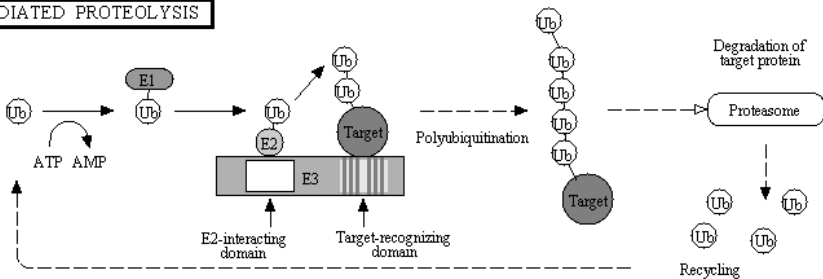

**E1**  
(Ubiquitin-activating enzyme)

|      |        |        |      |
|------|--------|--------|------|
| UBA6 | URLE1A | UBLE1B | UBA3 |
|------|--------|--------|------|

**E2**  
(Ubiquitin-conjugating enzyme)

|        |        |        |        |        |        |        |       |
|--------|--------|--------|--------|--------|--------|--------|-------|
| UBE2A  | UBE2B  | UBE2C  | UBE2D2 | UBE2F  | UBE2G1 | UBE2G2 | UBE2H |
| UBE2I  | UBE2J1 | UBE2J2 | UBE2L3 | UBE2L6 | UBE2M  | UBE2N  | UBE2O |
| UBE2Q2 | UBE2R2 | UBE2S  | UBE2U  | UBE2W  | UBE2Z  | UBE2K  | BIRC6 |

**E3**  
(Ubiquitin ligase)

HECT type E3

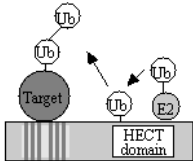

|       |       |        |        |       |
|-------|-------|--------|--------|-------|
| UBE3A | UBE3B | UBE3C  | SMURF1 | ITCH  |
| WWP1  | WWP2  | TRIP12 | NEDD4  | HUWE1 |
| UBR5  | HERC1 | HERC2  | HERC3  | HERC4 |

U-box type E3

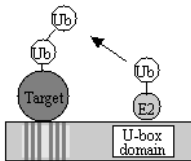

|       |       |      |
|-------|-------|------|
| UBE4A | UBE4B | CHIP |
| PP1L2 | PRP19 | UIP5 |

single RING-finger type E3

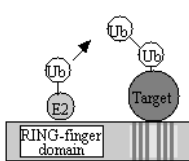

|       |       |       |       |        |        |        |
|-------|-------|-------|-------|--------|--------|--------|
| Mdm2  | CE1   | PARK2 | SLAH1 | PML    | TRAF6  | MAP2K1 |
| RFWD2 | RCHY1 | BIRC2 | PLAS1 | SYVN1  | NHLRC1 | AIRE   |
| MGRN1 | BRCA1 | FANCL | MID1  | TRIM32 | TRIM37 |        |

multi subunit RING-finger type E3

Cullin-Rbx E3

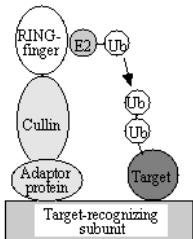

|              | RING finger | Cullin | Adaptor protein | Target recognizing subunit |
|--------------|-------------|--------|-----------------|----------------------------|
| SCF complex  | RBX1        | Cul1   | SKP1            | FBXW14                     |
| ECV complex  | RBX1        | CUL2   | EloB<br>EloC    | VHLbox                     |
| Cul3 complex | RBX1        | CUL3   |                 | RHOBTB4                    |
| Cul4 complex | RBX1        | CUL4B  | DDB1            | ERCC8                      |
| ECS complex  | RNF7        | CUL5   | EloB<br>EloC    | SOCS4                      |
| Cul7 complex | RBX1        | Cul7   | SKP1            | Fbxw8                      |

APC/C

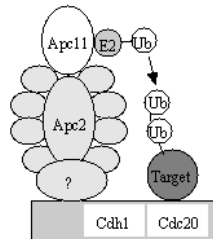

|       | RING finger | Cullin | Adaptor protein | Target recognizing subunit | Other subunits |
|-------|-------------|--------|-----------------|----------------------------|----------------|
| APC/C | Apc11       | Apc2   | ?               | Cdc20                      | Apc1<br>CDC27  |
|       |             |        |                 | Cdh1                       | Apc4<br>Apc5   |
|       |             |        |                 |                            | Apc6<br>Apc7   |
|       |             |        |                 |                            | CDC23<br>Apc9  |
|       |             |        |                 |                            | Apc10<br>Apc12 |
|       |             |        |                 |                            | ANAPC13        |
