# Supplementary material for: Comparison of serum and saliva miRNAs for identification and characterization of mTBI in adult mixed martial arts fighters
Source: PubMed Central journal article supplement (PMC6314626; doi:10.1371/journal.pone.0207785), 2019-01-02

**LONG-TERM DEPRESSION**

Saliva

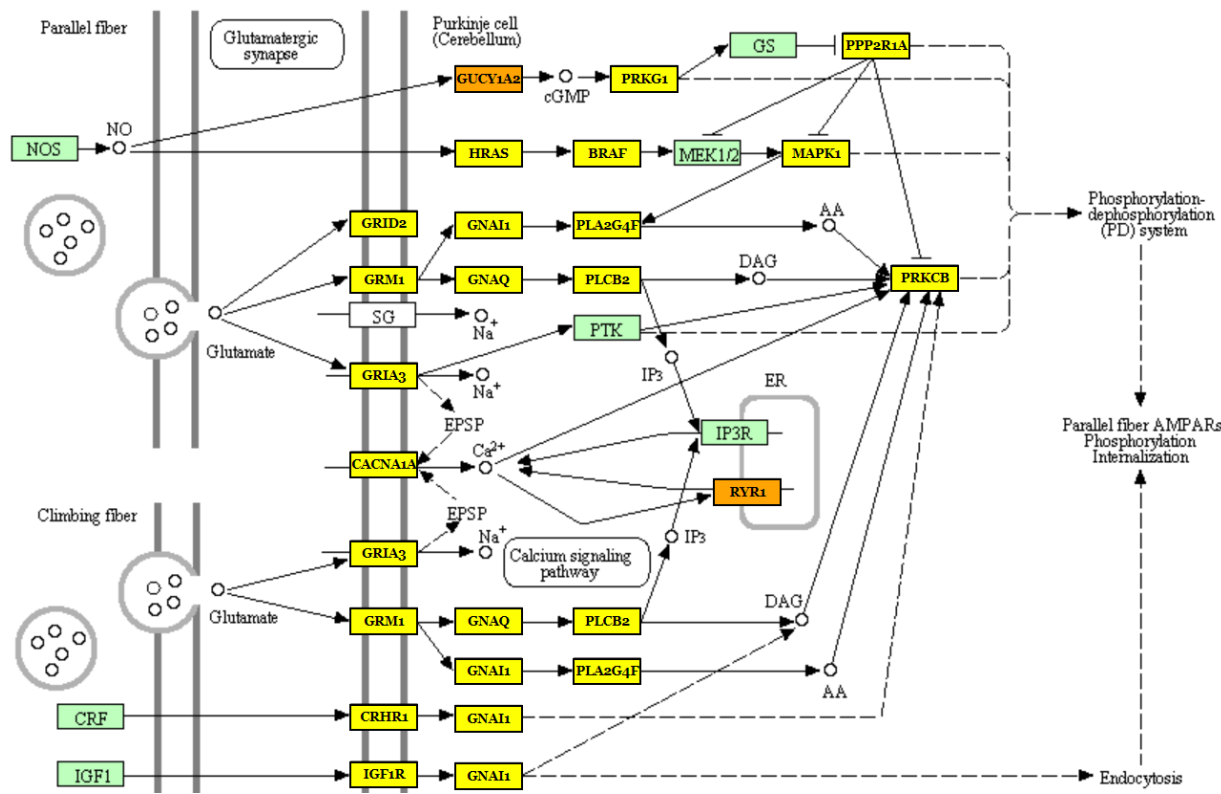

**LONG-TERM POTENTIATION**

Serum

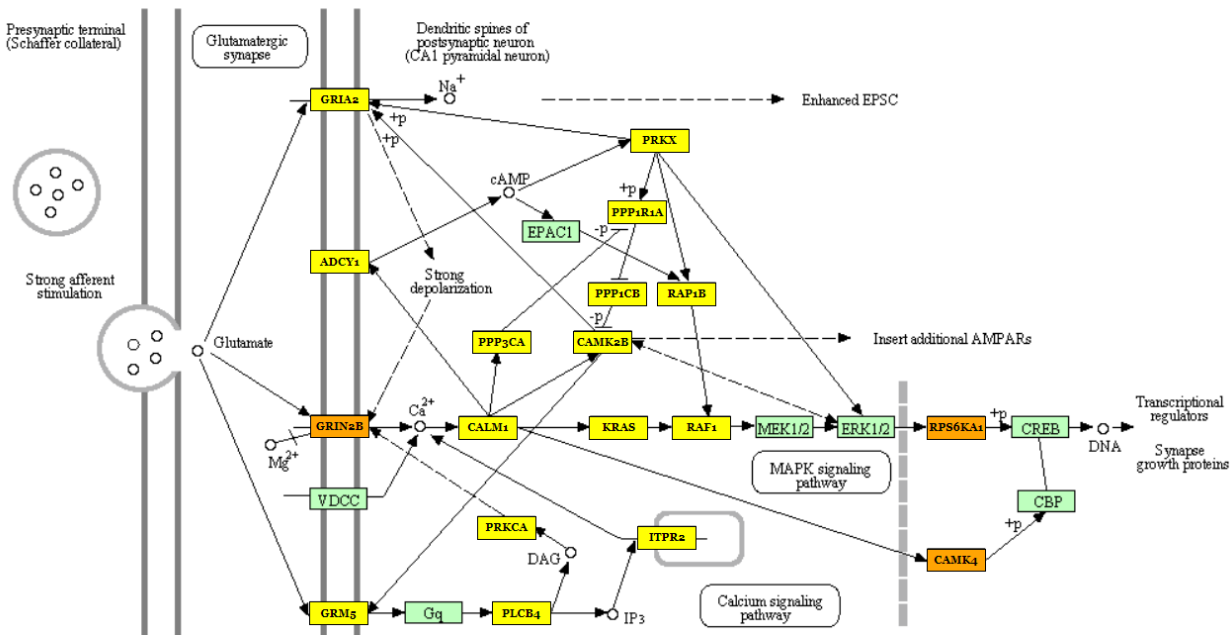

Supplement: pone.0207785.s008.pdf [file pone.0207785.s008.pdf]
